# Supplementary material
Source: Elsevier journal article supplement (https://www.sciencedirect.com/science/article/pii/S0212656721002250)
Supplement: mmc1 [file S0212656721002250:mmc1.docx]

**Material complementario en Apéndice on-line:**

A.1 Carta utilizada en la intervención

**D. Paciente PACIENTE PACIENTE**

**C/ Nombre de calle, nº x, Piso x**

**48XXX- BILBAO**

(Estimado) (nombre de pila):

Le escribo por lo siguiente. Uno de los medicamentos que está tomando desde hace ya un tiempo es el (nombre del medicamento) que pertenece al grupo de los antiulcerosos, conocidos popularmente como “protectores de estómago”. Me dirijo a usted para compartir cierta información sobre este tipo de medicamentos:

- Estos fármacos se utilizan principalmente para tratar o prevenir problemas estomacales como el ardor, el reflujo o las úlceras.

- En general, se considera que son fármacos seguros, aunque no están exentos de riesgos, sobre todo en su utilización a largo plazo: neumonías, falta de magnesio o vitamina B12, o fractura de huesos, entre otros.

- Aunque en algunas situaciones está justificado usarlos de forma prolongada, a menudo se utilizan más tiempo del necesario, aumentando el riesgo de estos efectos adversos. Por este motivo, si no son necesarios y no hay ardor o dolor de estómago, es mejor retirarlos.

- Existen medidas no farmacológicas, como algunos cambios en los hábitos de alimentación, que nos pueden ayudar en caso de que aparezca ardor de estómago de manera ocasional.

**Por todo ello, tras haber revisado su historia clínica,** **le propongo que vaya reduciendo la dosis del fármaco de forma progresiva hasta retirarlo.** Es importante que, si lleva tiempo tomándolo, **NO lo suprima bruscamente**. Es preferible hacerlo poco a poco, tal como se indica en la hoja informativa que le adjunto**,** que ha sido elaborada por profesionales de Osakidetza y del Departamento de Salud del Gobierno Vasco. En su caso, la reducción escalonada podría ser tomar el medicamento un día sí y otro no, durante 1-2 semanas y después, un día sí y dos no, durante 1-2 semanas más y dejarlo del todo en el curso de unas 4 semanas. En el caso de volver a tener síntomas, puede tomarlo de nuevo hasta que se pasen o utilizar antiácidos tipo Almax® que producen un alivio rápido.

Conviene recordar una situación especial: en caso de que usted esté tomando **aspirina o un antiinflamatorio (ibuprofeno, diclofenaco, dexketoprofeno…) y tenga más de 65 años, no deje de tomar el “protector de estómago” los días que dure el tratamiento.**

En cualquier caso, tenga en cuenta que estamos aquí para ayudarle, así que si lo prefiere, puede concertar una cita para acordar juntos la pauta de reducción de dosis o comentar cualquier duda o dificultad que pueda tener.

Por último, queremos informarle de que se va a llevar a cabo un estudio para conocer si el envío de estos consejos a través de esta carta es efectivo para conseguir disminuir el uso de antiulcerosos. Por ello, sus datos podrán ser utilizados por los investigadores del estudio de forma anónima y respetando la confidencialidad de los mismos en todo momento. No obstante, usted puede negarse a que se utilicen sus datos en cualquier momento, sin que de ello derive ningún perjuicio ni se vea afectada su atención médica. Para ello, basta con llamar por teléfono al siguiente número: 94 4007318 (en horario de 8.30-14.30).Comentarle también que el estudio está aprobado por el Comité de Ética e Investigación Clínica del Hospital Universitario de Basurto.

Por supuesto, estoy a su disposición para responder a todas sus preguntas.

Un cordial saludo,

Nombre del médico familia

**D. Paciente PACIENTE PACIENTE**

**C/ Nombre de calle, nº x, Piso x**

**48XXX- BILBAO**

(nombre de pila) estimatua:

Honegatik idazten dizut: zu aspalditik hartzen ari zaren medikamentu hau da: ………………. . Medikamentu hori ultzera kontrakoen taldekoa da; horrelakoei “urdail-babesle” esaten zaie herri mailan. Zuregana jotzen dut, horrelako medikamentuen gaineko informazio hau helarazteko:

- Farmako horiek erabiltzen dira, batez ere, urdaileko arazo batzuk tratatu edo prebenitzeko, hala nola bihotzerrea, errefluxua edo ultzerak.

- Oro har, farmako segurutzat jotzen dira, baina arriskuak ere badauzkate, batez ere epe luzean erabiltzen direnean: pneumoniak, magnesio edo B12 bitamina gabeziak, zein hezur-haustura, besteak beste.

- Nahiz eta zenbait egoeratan justifikatuta dagoen epe luzean erabiltzea, sarritan behar baino denbora luzeagoan erabiltzen dira, eta, hori dela-eta, handitu egiten da aurkako ondorio horiek izateko arriskua. Horregatik, beharrezkoak ez badira eta ez badago bihotzerrerik edo urdaileko minik, hobe da ez erabiltzea.

- Badaude zenbait neurri ez-farmakologiko, elikadura apur bat aldatzea adibidez, lagungarriak izango zaizkigunak inoiz azaldu daitekeen bihotzerrea arintzeko.

**Horregatik guztiagatik, zure historia klinikoa aztertu ostean, proposatzen dizut farmakoaren dosia apurka murriztea, guztiz utzi arte.** Baldin eta denbora luzea badaramazu hartzen, garrantzitsua da **bat-batean EZ uztea**. Hobe da apurka-apurka egiten joatea, ondoko informazio-orrian azaltzen den bezala. Orri hori, Osakidetzako eta Eusko Jaurlaritzako Osasun Saileko profesionalek egin dute. Zure kasuan, honela egin zenezake mailakatutako murrizketa hori: medikamentua bi egunetik behin hartu, 1-2 astez; eta, ondoren, egun batean bai, eta hurrengo bi egunetan ez, beste 1-2 astez. Horrela, guztiz utziko zenuke 4 asteko epean, gutxi gorabehera. Sintomak berriz azalduz gero, berriro hartu ahal duzu sintomak pasatu arte, edo Almax® gisako antiazidoak erabili ahal dituzu, hobekuntza azkar eragiten dute eta.

Egoera berezi bat hartu behar duzu kontuan: **aspirina edo antiinflamatorio bat hartzen ari bazara (ibuprofenoa, diklofenakoa, dexketoprofenoa… ) eta 65 urte baino gehiago badauzkazu, ez utzi “urdail-babeslea” hartzeari tratamenduak iraun bitartean.**

Edozein modutan ere, kontuan hartu zuri laguntzeko gaudela, eta, hala nahiago baduzu, hitzordu bat adostu ahal duzula gurekin, dosia murrizteko modua elkarrekin zehazteko, edo zure zalantza edo zailtasunez hitz egiteko.

Azkenik, jakinarazi nahi dizugu azterlan bat egingo dela jakiteko ea aholku hauek eraginkorrak izan diren ultzera kontrako botikiken erabilera murrizteari begira. Horregatik, baliteke azterlaneko ikertzaileek zure datuak erabiltzea, modu anonimoan eta uneoro konfidentzialtasuna errespetatuta betiere. Hala ere, zuk edozein unetan uko egin ahal diozu zure datuak erabiltzeari, eta horrek ez dizu kalterik ekarriko, ezta zuri eman beharreko arreta medikoari eragingo ere. Horretarako, nahikoa da telefono-zenbaki honetara deitzea: 94 4007318 (8:30etik 14:30era). Bestetik, esan behar dizugu azterlana Basurtuko Unibertsitate Ospitaleko Etikako eta Ikerketa Klinikoko Batzordeak onartu duela.

Ez eduki zalantzarik; zure esanetara nago, edozein galderari erantzuteko.

Adeitasunez,

Familia-medikuaren izena

Material de i-botika

A.2.1 Omeprazoles, quizá sea el momento de dejarlos. Consúltalo


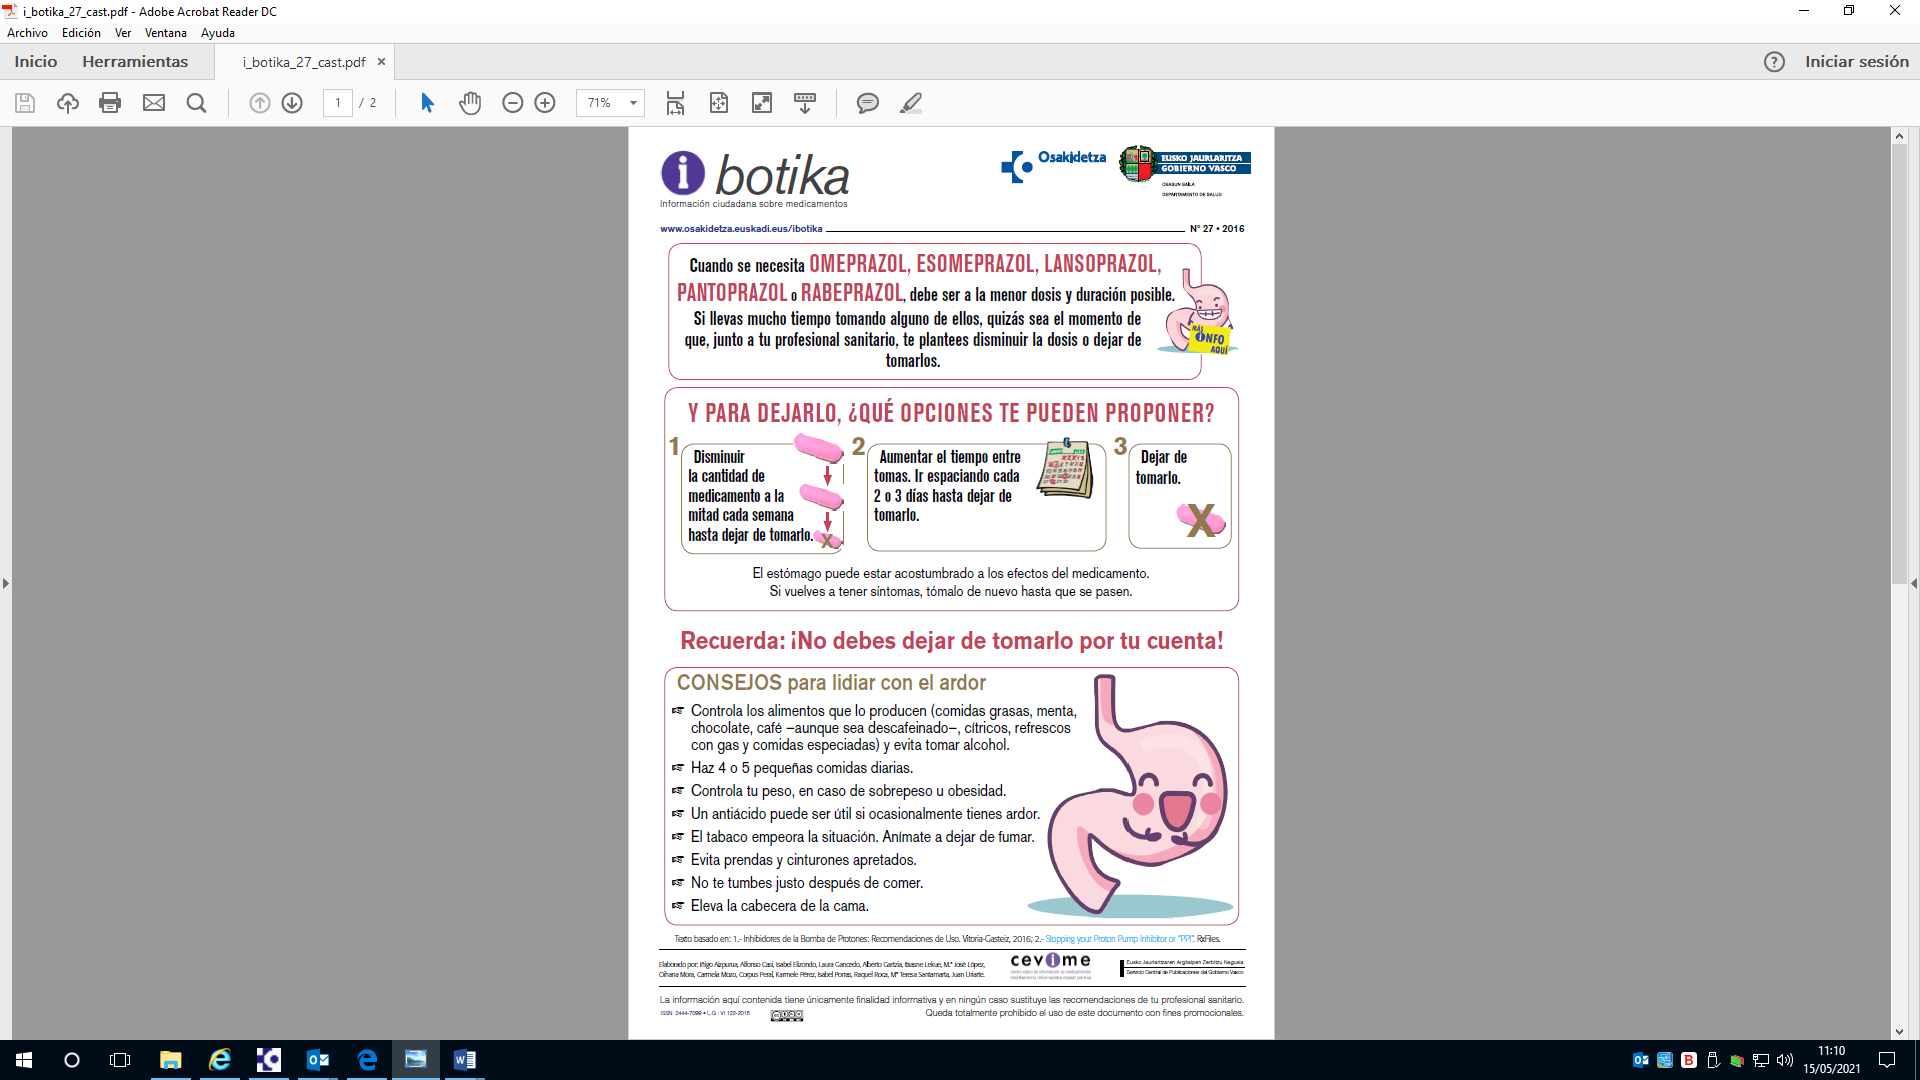


Disponible en: <https://www.euskadi.eus/contenidos/informacion/ibotika_fitxak/es_def/adjuntos/i_botika_27_cast.pdf>

A.2.2. Omeprazoles, los justos


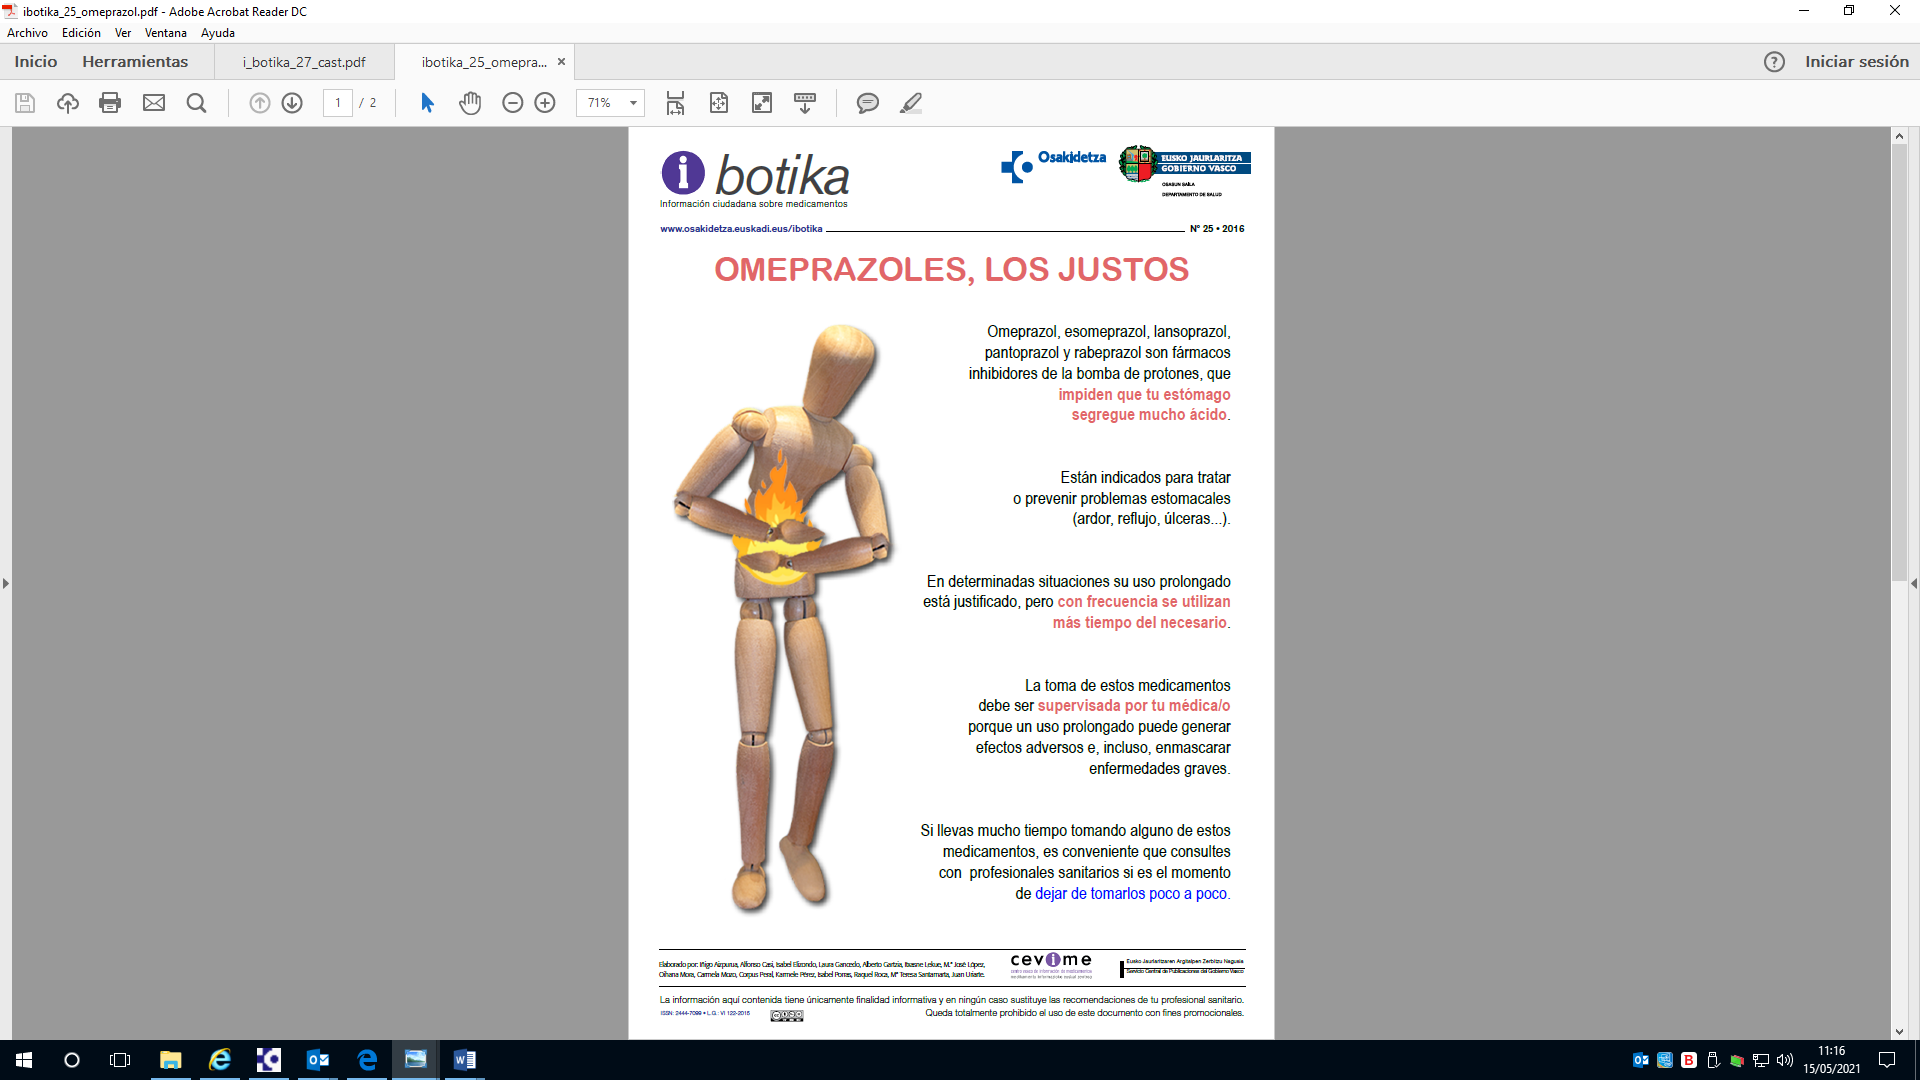


Disponible en: <https://www.euskadi.eus/contenidos/informacion/ibotika_fitxak/es_def/adjuntos/ibotika_25_omeprazol.pdf>

**A3. Criterios de inclusión y exclusión.**

| **Criterios de inclusión** |
| --- |
| 1. Edad mayor de 18 años y menor de 80 años 2. Prescripción crónica de un IBP (código ATC del principio activo comienza por A02BC) 3. Inicio de la prescripción anterior a 12 meses (anterior a mayo de 2016) 4. Dosis prescrita estándar o menor (se considera dosis estándar a 20 mg para omeprazol, esomeprazol y rabeprazol, 30 mg para lansoprazol y 40 mg para pantoprazol) 5. Porcentaje de dispensaciones en los últimos 8 meses mayor del 50% 6. Al menos una dispensación en los últimos tres meses. |
| **Criterios de exclusión** |
| 1. Episodio activo de enfermedad de origen digestivo, considerando los siguientes episodios codificados según la clasificación CIE-9-MC*  - 150-159: Neoplasias malignas de los órganos digestivos y del peritoneo - 530 Enfermedades del esófago; 531 Úlcera gástrica; 532 Úlcera duodenal; 533 Úlcera péptica sitio no especificado; 534 Úlcera gastroyeyunal; 535 Gastritis y duodenitis; 536 Trastornos funcionales del estómago; 537 Otros trastornos del estómago y del duodeno. - 562 Divertículos intestinales; 569.82 Ulceración intestinal; 569.83 Perforación intestinal; 569.89 Otra (569.8 otros trastornos intestinales especificados); 569.9 Trastorno intestinal no especificado - 578: Hemorragia gastrointestinal  1. Prescripción crónica de medicamentos gastrolesivos (AINE, metamizol, corticoide sistémico, anticoagulante, antiagregante) 2. Comorbilidades psiquiátricas 3. Demencia 4. Pacientes en cuidados paliativos 5. **Cualquier otra circunstancia actual por la que su médico de familia NO considere apropiada la intervención para ese paciente.** |

Abreviaturas: IBP: inhibidores de la bomba de protones, ATC: Anatomical Therapeutic Chemical Classification, AINE: antiinflamatorio no estoroideo

*disponible en: <https://eciemaps.mscbs.gob.es/ecieMaps/browser/index_9_mc.html#search=&flags=111100&flagsLT=11111111&searchId=1615106438943&indiceAlfabetico=&listaTabular=id-3275-class-150-159&expand=0&clasification=cie9mc&version=2014>

**A4. Características basales de los pacientes participantes**

| N (pacientes que recibieron la carta) | 547 |
| --- | --- |
| *Sexo* | |
| Mujeres (%) | 355 (64,9%) |
| Hombres (%) | 192 (35,1%) |
| *Edad (años)* | |
| Media (SD) | 64,42 (10,75) |
| *Tramos edad (%)* | |
| <40 años | 13 (2,4%) |
| 40-59 años | 154 (28,2%) |
| 60-69 años | 154 (28,2%) |
| 70-79 años | 226 (41,3%) |
| *IBP prescrito* |  |
| Omeprazol | 431 (78,8%) |
| Pantoprazol | 45 (8,2%) |
| Esomeprazol | 29 (5,3%) |
| Lansoprazol | 24 (4,4%) |
| Rabeprazol | 18 (3,3%) |
| *Dosis prescrita (mg equivalentes a Omeprazol)* | |
| Media (SD) | 19,43 mg (2,31) |
| *Tramo dosis* |  |
| Dosis baja (equiv. a 10 mg omeprazol) | 31 (5,7%) |
| Dosis estándar (equiv. a 20 mg omeprazol) | 516 (94,3%) |
| *Tiempo de consumo* | |
| Entre 1-5 años | 304 (55,6%) |
| Mayor de 5 años | 243 (44,4%) |
| *DE: desviación estándar; IBP: inhibidor de la bomba de protones* | |

.

**A5. Diferencias en el consumo medio de IBP por paciente antes y después de la intervención**

|  |  |  |  |  |
| --- | --- | --- | --- | --- |
|  |  |  |  |  |
|  | **Periodo pre- intervención**  **(1-3 antes de la intervención)** | **Periodo post- intervención**  **(4-6 tras la intervención** | **Media de la diferencia de la DTD** | **IC 95%** |
| Media del consumo DTD  (número de Dosis equivalentes a 20 mg OME) | 78,69 | 56,15 | 22,53 | 19,22-25,86 p<0,01 |

DTD: Nº Dosis Totales dispensadas; OME: Omeprazol; IC: intervalo de confianza del 95%

Prueba t de Student para muestras emparejadas

**A6. Resumen de la Intervención Benzocarta y la IBP-carta**

|  | **Benzocarta** | **IBP-carta** |
| --- | --- | --- |
| Número de participantes | 1561 | 547 |
| Edad (media y SD) | 69,3 (12,5) | 64,42 (10,75) |
| Sexo:   - Mujeres - Hombres | 1160 (74,3%)  401 (25,7%) | 355 (64,9%)  192 (35,1%) |
| MF participantes   - Sexo - Edad media | 51  75% mujeres  51,1 años | 45  64,9% mujeres  62,2 años |
| Tiempo de consumo | < 1 año 162 (10,4%)  1-4 años 869 (55,7%)  > 4 años 530 (34,0%) | 1-5 años 304 (55,6%)  >5 años 243 (44,4%) |
| Diferencias en el consumo (Media de la diferencia de la DTD*) | 17,79 (IC 14,45-21,14) | 22,53 (IC95 19,22-25,86) |
| Resultados   - Abandonó - Disminución - Mantuvo - Aumentó | 339 (18,1%)  18,8%  40,4%  18,8% | 109 (20%)  178 (32,6%)  177 (32,4%)  82 (15%) |
| Número de consultas motivadas tras la carta | 287 (18,4%) | 51 (9,3%) |

*DTD: Dosis total dispensada. Medida en dosis equivalentes a diazepam 5 mg en el caso de Benzocarta y dosis equivalentes a omeprazol 20 mg en la IBP-carta.
